# Supplementary material for: Metabolomic study of soft corals from the Colombian Caribbean: PSYCHE and 1H-NMR comparative analysis
Source: PubMed Central journal article supplement (PMC7096504; doi:10.1038/s41598-020-62413-0), 2020-03-25
Supplement: 41598_2020_62413_MOESM1_ESM.pdf [file 41598_2020_62413_MOESM1_ESM.pdf]

# Metabolomic study of soft corals from the Colombian Caribbean: PSYCHE and <sup>1</sup>H NMR comparative analysis

Liliana Santacruz<sup>1</sup>, Diana X. Hurtado<sup>1</sup>, Roisin Doohan<sup>2</sup>, Olivier P. Thomas<sup>2</sup>, Mónica Puyana<sup>3</sup> and Edison Tello\*<sup>1</sup>

<sup>1</sup> Bioprospecting Research Group and Biosciences Doctoral Program, Faculty of Engineering, Campus Puente del Común, Universidad de la Sabana, 250001 Chía, Colombia

<sup>2</sup> Marine Biodiscovery, School of Chemistry and Ryan Institute, National University of Ireland Galway (NUI Galway), University Road, H91 TK33 Galway, Ireland

<sup>3</sup> Departamento de Ciencias Biológicas y Ambientales, Universidad Jorge Tadeo Lozano, Carrera 4 # 22-61, 110311 Bogotá, Colombia; monica.puyana@utadeo.edu.co

\*Correspondence: [edisson.tello@unisabana.edu.co](mailto:edisson.tello@unisabana.edu.co) (E.T.)

Tel.: +57-32-0699-5696 (E.T.)

| Most commonly used methods for metabolomics analysis - advantages and disadvantages |                                                                                                                                                                                                                                     |                                                                                                                                                                                                    |
|-------------------------------------------------------------------------------------|-------------------------------------------------------------------------------------------------------------------------------------------------------------------------------------------------------------------------------------|----------------------------------------------------------------------------------------------------------------------------------------------------------------------------------------------------|
| Technology                                                                          | Advantages                                                                                                                                                                                                                          | Disadvantages                                                                                                                                                                                      |
| MS (LC/MS and GC/MS)                                                                | <ul style="list-style-type: none"> <li>• High analytical sensitivity</li> <li>• Robust technique</li> <li>• give more information (TR, MS)</li> </ul>                                                                               | <ul style="list-style-type: none"> <li>• Volume Large sample is required (500 L)</li> <li>• sample Destructive</li> <li>• Extensive sample preparation, (GC-MS) requires derivatization</li> </ul> |
| NMR Spectroscopy ( <sup>1</sup> H/PSYCHE)                                           | <ul style="list-style-type: none"> <li>• Less sample is required (1–10 L)</li> <li>• Robust and reproducible</li> <li>• Non-destructive sample</li> <li>• Minimal sample preparation</li> <li>• Time acquisition (≈7min)</li> </ul> | <ul style="list-style-type: none"> <li>• Low analytical sensitivity</li> <li>• Signal overlap</li> <li>• give less information (δppm)</li> <li>• Time acquisition (≈20 - 30min)</li> </ul>         |

**Table S1.** Advantages and disadvantages of the most commonly used methods for metabolomics analysis

| Name assigned by collection area | Name of the species                  | Accession | Código ICN-UN       |
|----------------------------------|--------------------------------------|-----------|---------------------|
| Cali 10                          | <i>Muriceopsis flavida</i>           | C10m      | ICN-MHN (Po)-CO-292 |
| Cali 11                          | <i>Eunicea flexuosa</i>              | C11E      | ICN-MHN (Po)-CO-276 |
| Cali 15                          | <i>Pseudopterogorgia albatrossae</i> | C15Pst    | ICN-MHN (Po)-CO-278 |
| Cali 16                          | <i>Eunicea fusca</i>                 | C16E      | ICN-MHN (Po)-CO-277 |
| Cali 18                          | <i>Muriceopsis flavida</i>           | C18m      | ICN-MHN (Po)-CO-292 |
| Cali 19                          | <i>Eunicea flexuosa</i>              | C11E      | ICN-MHN (Po)-CO-276 |
| Cali 2                           | <i>Plexaura kukenthali</i>           | C2P       | ICN-MHN (Po)-CO-271 |
| Cali 24                          | <i>Plexaurella nutans</i>            | C24p      | ICN-MHN (Po)-CO-281 |
| Gra 10                           | <i>Eunicea knightii</i>              | G10Ek     | ICN-MHN (Po)-CO-287 |
| Gra 1                            | <i>Plexaurella fusifera</i>          | G1P Plr   | ICN-MHN (Po)-CO-282 |
| Gra 13                           | <i>Eunicea clavigera</i>             | G13E      | ICN-MHN (Po)-CO-275 |
| Gra 14                           | <i>Eunicea cf. calyculata</i>        | G14E      | ICN-MHN (Po)-CO-288 |

|        |                                  |       |                     |
|--------|----------------------------------|-------|---------------------|
| Gra 16 | <i>Eunicea knightii</i>          | G16Ek | ICN-MHN (Po)-CO-287 |
| Gra 17 | <i>Pseudoplexaura flagellosa</i> | G17Ps | ICN-MHN (Po)-CO-289 |
| Gra 18 | <i>Plexaura kukenthali</i>       | G18P  | ICN-MHN (Po)-CO-292 |
| Gra 21 | <i>Plexaura homomalla</i>        | G21P  | ICN-MHN (Po)-CO-283 |
| Gra 2  | <i>Plexaura homomalla</i>        | G2P   | ICN-MHN (Po)-CO-283 |
| Gra 22 | <i>Plexaurella sp.</i>           | G22P  | ICN-MHN (Po)-CO-291 |
| Gra 24 | <i>Plexaura homomalla</i>        | G2P   | ICN-MHN (Po)-CO-283 |
| Gra 3  | <i>Eunicea clavigera</i>         | G13E  | ICN-MHN (Po)-CO-284 |
| Gra 4  | <i>Eunicea asperula</i>          | G4E   | ICN-MHN (Po)-CO-285 |
| Gra 6  | <i>Plexaura kukenthali</i>       | G6Pk  | ICN-MHN (Po)-CO-271 |
| Gra 8  | <i>Eunicea clavigera</i>         | G8E   | ICN-MHN (Po)-CO-275 |
| Gra 9  | <i>Plexaura sp.</i>              | G9P   | ICN-MHN (Po)-CO-286 |

**Table S2.** Name of species of soft corals used in this research a Collection Code (ICN), assigned by Collection of the Institute of Natural Sciences of the National University of Colombia. (Bogotá, Colombia)

| Obs | name    | Siha (%) | Pc3 (%) | A549 (%) | L929 (%) |
|-----|---------|----------|---------|----------|----------|
| 1   | C10m    | 23.1     | 20.8    | 31.0     | 49.8     |
| 2   | C11E    | 36.8     | 12.1    | 49.3     | 21.7     |
| 3   | C15Pst  | 26.8     | 20.3    | 71.5     | 25.9     |
| 4   | C16E    | 60.5     | 30.0    | 39.1     | 21.3     |
| 5   | C18m    | 21.2     | 15.0    | 26.5     | 13.8     |
| 6   | C19E    | 15.1     | 16.1    | 36.1     | 20.7     |
| 7   | C2P     | 46.2     | 7.8     | 62.4     | 16.2     |
| 8   | C24p    | 13.1     | 65.1    | 39.0     | 13.3     |
| 9   | G10Ek   | 46.1     | 1.3     | 35.4     | 14.5     |
| 10  | G1P Plr | 39.4     | 23.8    | 33.0     | 11.5     |
| 11  | G13E    | 46.9     | 30.9    | 39.7     | 6.8      |
| 12  | G14E    | 63.5     | 22.0    | 65.7     | 19.2     |
| 13  | G16Ek   | 26.1     | 15.3    | 30.4     | 14.5     |
| 14  | G17Ps   | 66.8     | 40.3    | 71.5     | 65.9     |
| 15  | G18P    | 44.0     | 64.0    | 52.5     | 31.2     |
| 16  | G21P    | 25.5     | 20.9    | 34.0     | 18.4     |
| 17  | G2P     | 34.8     | 47.6    | 21.1     | 14.3     |
| 18  | G22P    | 37.6     | 63.5    | 31.9     | 20.7     |
| 19  | G24P    | 37.6     | 33.5    | 31.9     | 20.7     |
| 20  | G3E     | 59.9     | 43.7    | 35.3     | 5.8      |

|    |                        |      |      |      |      |
|----|------------------------|------|------|------|------|
| 21 | G4E                    | 53.9 | 41.5 | 67.6 | 14.6 |
| 22 | G6Pk                   | 57.0 | 40.3 | 38.5 | 23   |
| 23 | G8E                    | 54.8 | 47.6 | 22.1 | 14.3 |
|    | G9P                    | 34.5 | 20.4 | 31.0 | 49.8 |
| 29 | Doxorubicin<br>(25ppm) | 60.1 | 46.9 | 58.2 | 16.0 |

**Table S3.** Percentage of cytotoxic activity against three cancerous cell lines and fibroblasts L929 (ATCC®CCL-1™) which was used as non-tumor cell line for toxicity control.

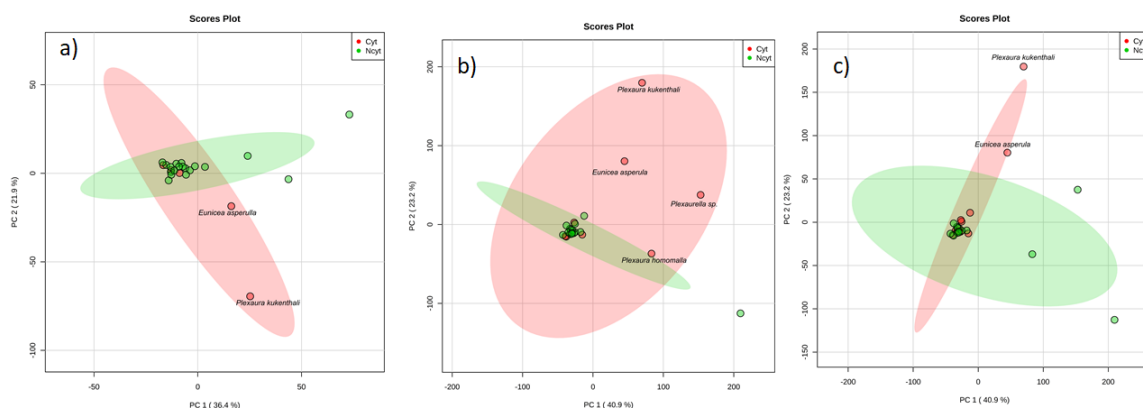

**Figure S1.** Principal component analysis score plot of  $^1\text{H-NMR}$ /metabolomics data from 24 extracts based on their cytotoxicity against different cancer cell lines (a) human lung adenocarcinoma, A549 (b) human prostatic carcinoma, PC3 and (c) human cervical cancer, SiHa. Red dots indicate active extracts, green dots represent extracts that were not active. An extract was considered active if it exhibited an inhibition of the tumor cell lines  $\geq 40\%$  at  $20 \mu\text{g/mL}$  [22]. The ellipses indicate confidence intervals of 95%.

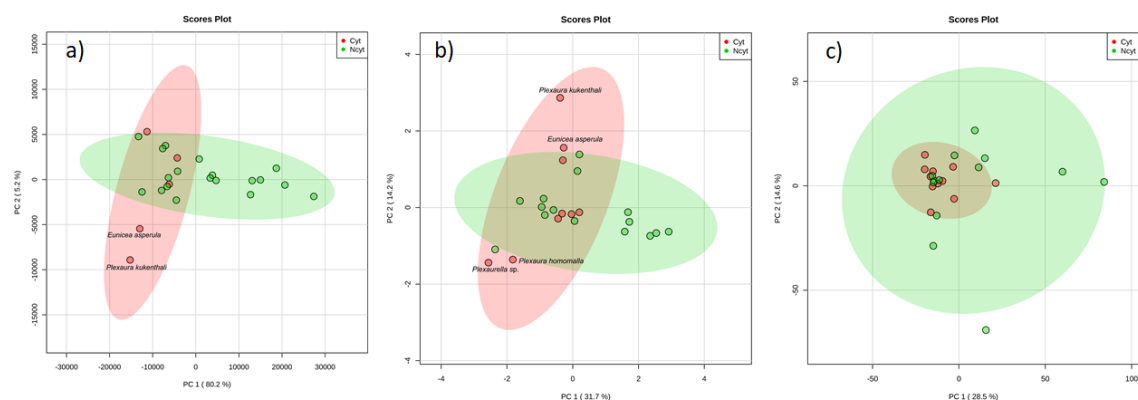

**Figure S2.** Principal component analysis score plot of PSYCHE/metabolomics data from 24 extracts based on their cytotoxicity against three different tumor cancer cell lines (a) human lung adenocarcinoma A549 (b) human prostatic carcinoma PC3 and (c) human cervical cancer SiHa. Red dots indicate active extracts, green dots represent extracts that were not active. An extract was considered active if it exhibited an inhibition of the tumor cell lines  $\geq 40\%$  at  $20 \mu\text{g/mL}$  (Hostettman, 1991). The ellipses indicate confidence intervals of 95% (Chong et al., 2018).

#### Supplementary text for 1H-NMR and PSYCHE experiments data extraction

|                                                                                        |
|----------------------------------------------------------------------------------------|
| Instrument/Vendor/Format = Varian                                                      |
| Spectra type = fid                                                                     |
| The original name of the Zip file = testPscmple31hasta8ppm sincali8nigra20.zip         |
| The number of Spectra = 24                                                             |
| # Calibration: PPM REF = 0, Zone Ref = (0.045,0.071) to PSYCHE experiment              |
| # calibration 0.045 0.071 0 10.2 10.5                                                  |
| ## Normalisation (CSN) of the Intensities based on the selected PPM ranges 0.348 7.847 |
| # Global Baseline Correction: PPM Range = (-0.499764773120937, 10.999765269097)        |

```

# gbaseline 10.2 10.5 -0.499764773120937 10.9997652690972 100 70
# Alignment of the selected zones (0.18,7.972)
Rbuc1D: --- BUCKETING MODULE ---
Rbuc1D: Read the SpecProcpar.ini file ...
Rbuc1D: Read the spectra processing parameters file (list_pars.csv) ...
Rbuc1D: Read the specs.pack.
Rbuc1D: Bucketing method = AIBIN
Rbuc1D: Noise Zone= (10.5 ,10.2), (818 - 1310)
Rbuc1D: Factor Resolution = 0.3
Rbuc1D: Zone 1 = (0.133, 7.905), Nb Buckets = 1230
Rbuc1D: Total Buckets = 113 to PSYCHE experiment
The parameters for 1H-NMR are the same, only the calibration varies using CDCl3:
# Calibration: PPM REF = 7.26, Zone Ref = (7.25, 7.26)

```

**Table S4.** Scrip using NMRProcFlow software to 1H-NMR and PSYCHE experiments to data extraction

| Main results of the study |                   |                                                   |                                                                                                                   |                                                                                                   |                                                                                        |
|---------------------------|-------------------|---------------------------------------------------|-------------------------------------------------------------------------------------------------------------------|---------------------------------------------------------------------------------------------------|----------------------------------------------------------------------------------------|
| Experiment                | Tumoral cell line | Cytotoxic activity<br>(statistically significant) | Extracts that exhibit<br>activity                                                                                 | VIP Features                                                                                      | Compounds / Putative<br>identification                                                 |
| <sup>1</sup> H NMR        | A549              | No                                                | -                                                                                                                 | -                                                                                                 | -                                                                                      |
|                           | PC3               | No                                                |                                                                                                                   |                                                                                                   |                                                                                        |
|                           | SiHa              | No                                                | -                                                                                                                 | -                                                                                                 | -                                                                                      |
| Psyche                    | A549              | No                                                |                                                                                                                   |                                                                                                   |                                                                                        |
|                           | PC3               | Si                                                | <ul style="list-style-type: none"> <li>• <i>Plexaura kukenthalii</i></li> <li>• <i>Plexaurella</i> sp.</li> </ul> | <ul style="list-style-type: none"> <li>• B2_5118</li> <li>• B4_4965</li> <li>• B4_7686</li> </ul> | <ul style="list-style-type: none"> <li>• Asperdiol</li> <li>• Plexauroalone</li> </ul> |
|                           | SiHa              | No                                                | -                                                                                                                 | -                                                                                                 | -                                                                                      |

**Table S5.** Summarizing the key results of the study

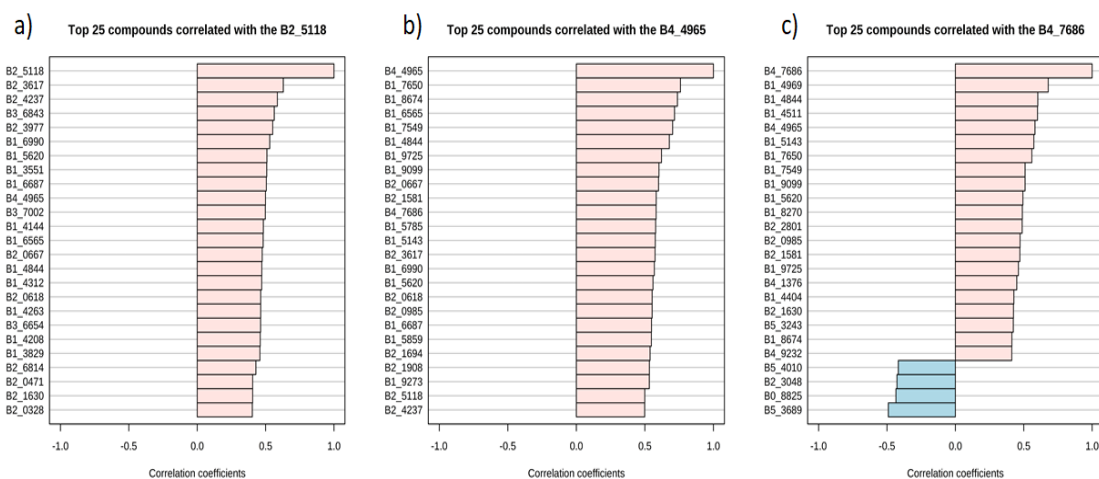

**Figure S3.** Twenty five features that most correlate with the features B2\_5118, B\_4965 and B4\_7686 , established using "Pattern Hunter" a tool of MetaboAnalyst software (Chong et al., 2018).

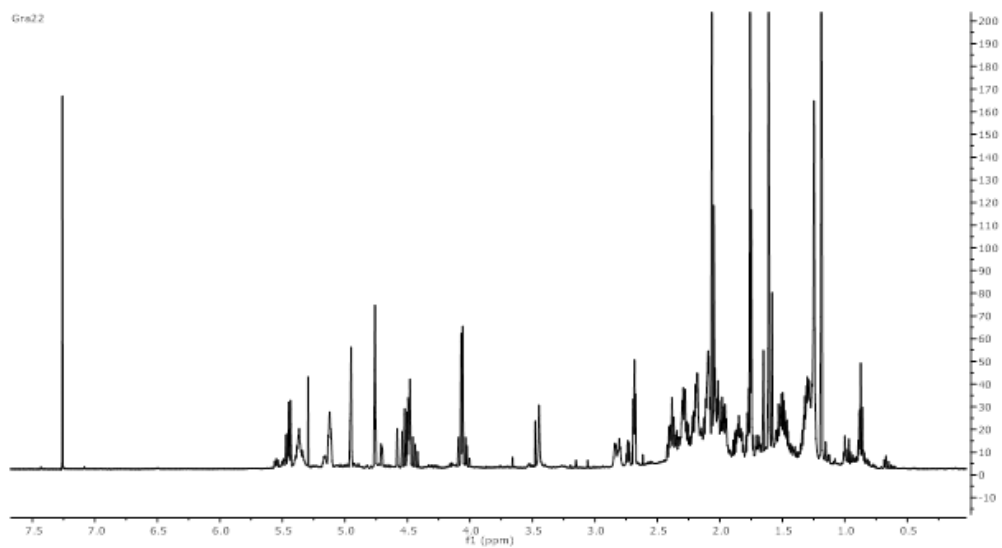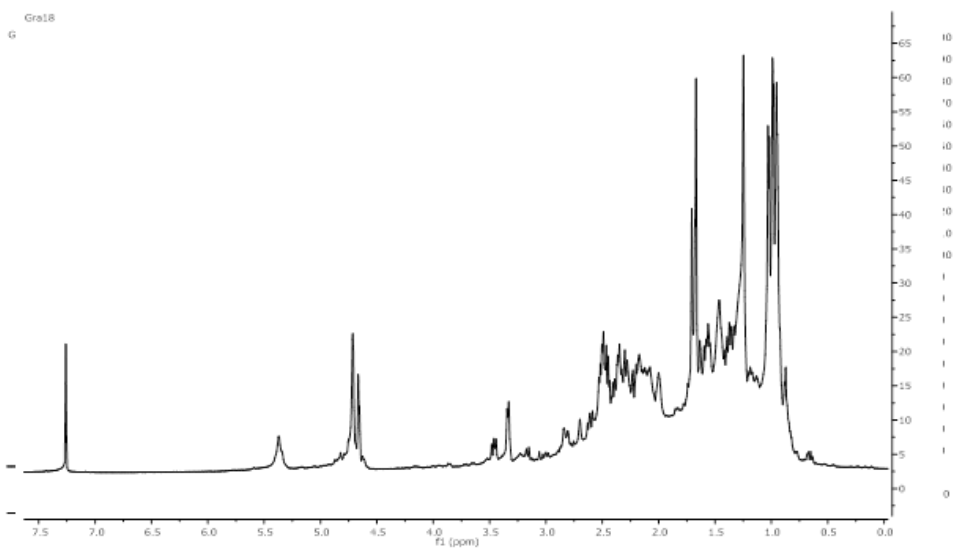

**Figure S4.** a) <sup>1</sup>H NMR spectrum of crude extract from specie *Plexaurella* sp, (Gra22) in CDCl<sub>3</sub> at 600 MHz. b) <sup>1</sup>H NMR spectrum of crude extract from specie *Plexaura kukenthalii* (Gra18) in CDCl<sub>3</sub> at 600 MHz.

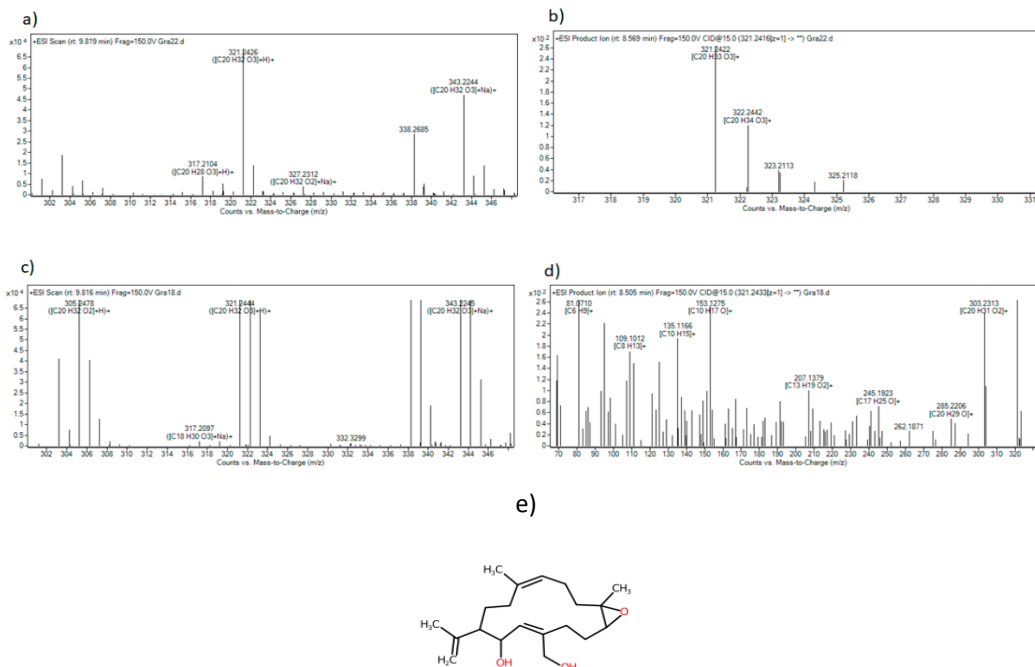

**Figure S5.** a) MS from *Plexaurella* sp (Gra 22) extract, b) MS/MS spectrum of 321.2416 ion from *Plexaurella* sp, c) MS from *Plexaurea kukenthali* (Gra 18) extract, d) MS/MS spectrum of 321.2433 ion from *Plexaurea kukenthali*. These spectrums confirming the possible presence of the compound asperdiol showing a molecular formula of  $C_{20}H_{32}O_3$ , e) asperdiol compound structure.

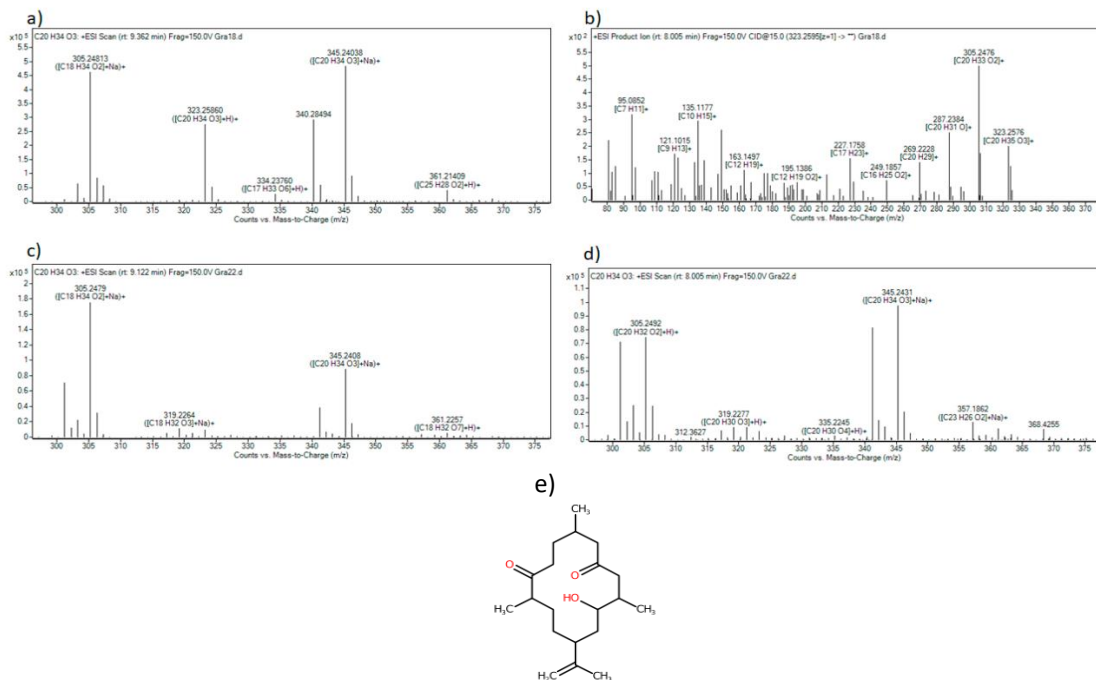

**Figure S6.** a) MS from *Plexaurea kukenthali* (Gra 18) extract, b) MS/MS spectrum of 323.2595 ion from *Plexaurella* sp, c) MS from *Plexaurella* sp, (Gra 22) extract, d) MS/MS spectrum of 345.2431 ion from *Plexaurella* sp. These spectrums confirming the possible presence of the compound plexauroalone showing a molecular formula of  $C_{20}H_{34}O_3$ , e) plexauroalone compound structure.
